# Supplementary material
Source: HighWire-hosted journal article supplement (http://molpharm.aspetjournals.org/highwire/filestream/76601/field_highwire_adjunct_files/1/supplement_table.pdf)
Supplement: supplement_table.pdf [file supplement_table.pdf]

**Supplement Table:** Details of Primer Sequences, Expected Product Sizes and Annealing Temperatures for RT-PCR for Human TGF $\beta$  Superfamily Receptors

| Receptor (Alt. name)   | Accession Number | Primer (region of Accession sequence)      | Sequence                                                       | Product size | Anneal Temp | Ref                         |
|------------------------|------------------|--------------------------------------------|----------------------------------------------------------------|--------------|-------------|-----------------------------|
| ALK1                   | Z22533           | sense (1516-1532)<br>antisense (1824-1806) | 5'-ACCATCGTGAATGGCATC-3'<br>5'-GCAGGCAGAAAGGAATCAG-3'          | 308bp        | 57.5°C      |                             |
| ALK2 (Act-RI)          | Z22534           | sense (114-134)<br>antisense (624-604)     | 5'-GAGTGATGATTCTTCCTGTGC-3'<br>5'-TTGGTGGTGTGATGAGCCCTTCG-3'   | 511bp        | 53.8°C      | (Alexander et al., 1996)    |
| ALK3 (BMP-RIA)         | Z22535           | sense (860-881)<br>antisense (1899-1875)   | 5'-CAAGCAGACGTCGTTACAATCG-3'<br>5'-TACATCTTGGGATTCAACCATC-3'   | 1040bp       | 56.2°C      |                             |
| ALK4 (Act-RIB)         | Z22536           | sense (520-539)<br>antisense (1418-1400)   | 5'-TCCAAAGACAAGACGCTCC-3'<br>5'-ATCATCTTCCCCATCACCC-3'         | 898bp        | 57.5°C      |                             |
| ALK5 (TGF $\beta$ -RI) | L11695           | sense (1268-1288)<br>antisense (1518-1501) | 5'-CGTGCTGACATCTATGCAAT-3'<br>5'-AGCTGCTCCATTGGCATAAC-3'       | 250bp        | 57.5°C      | (McCaffrey et al., 1999)    |
| ALK6 (BMP-RIB)         | D89675           | sense (267-287)<br>antisense (1067-1048)   | 5'-TCTCAGAGCTCAGGAAGTGGATC-3'<br>5'-CTGTCAGCCTTGATGCAGGATTG-3' | 801bp        | 58.9°C      |                             |
| Act-RII                | D31770           | sense (850-870)<br>antisense (1284-1264)   | 5'-GCAAAATGAATACGAAGTCTA-3'<br>5'-GCACCCTCTAATACCTCTGGA-3'     | 434bp        | 56.2°C      | (Alexander et al., 1996)1)  |
| Act-RIIB               | X77533           | sense (80-100)<br>antisense (354-334)      | 5'-ACACGGGAGTGCATCTACTAC-3'<br>5'-GGCAAATGAGTGAAGCGCTCG -3'    | 274bp        | 56.7°C      | (Refaat et al., 2004)       |
| BMP-RII                | Z48923           | sense (683-701)<br>antisense (1473-1455)   | 5'-TAACTACCACTCCTCCCTC-3'<br>5'-CACCAGTCTATTTCCAGTC-3'         | 790bp        | 52.0°C      |                             |
| TGF $\beta$ -RII       | M85079           | sense (1050-1071)<br>antisense (1707-1688) | 5'-CCAACAACATCAACCACAACAC-3'<br>5'-TCATTTCCAGAGCACCAG-3'       | 677bp        | 61.8°C      |                             |
| betaglycan             | L07594           | sense (1315-1334)<br>antisense (1674-1655) | 5'-CAAGGGAATCTGGTGAAGTG-3'<br>3'-CACCTCTTCTGGCTCTCTGA-3'       | 360bp        | 57.5°C      | (Vanttinen et al., 2002)    |
| endoglin               | J05481           | sense (1626-1645)<br>antisense (2039-2020) | 5'-CAAGACCGGGTCTCAAGACC-3'<br>5'-CTGGGTCGAGTGGAGGACTG-3'       | 414bp        | 58.9°C      | (Diez-Marques et al., 2002) |
| $\beta$ -actin         | X00351           | sense (888-910)<br>antisense (1119-1098)   | 5'-ATGAAGTGTGACGTTGACATCCG-3'<br>GCTTGCTGATCCACATCTGCTG-3'     | 232bp        | 53.8°C      |                             |

## Reference List

Alexander JM, Bikkal H A, Zervas N T, Laws E R, Jr. and Klibanski A (1996) Tumor-Specific Expression and Alternate Splicing of Messenger Ribonucleic Acid Encoding Activin/Transforming Growth Factor-Beta Receptors in Human Pituitary Adenomas. *J Clin Endocrinol Metab* **81**:783-790.

Diez-Marques L, Ortega-Velazquez R, Langa C, Rodriguez-Barbero A, Lopez-Novoa J M, Lamas S and Bernabeu C (2002) Expression of Endoglin in Human Mesangial Cells: Modulation of Extracellular Matrix Synthesis. *Biochim Biophys Acta* **1587**:36-44.

McCaffrey TA, Du B, Fu C, Bray P J, Sanborn T A, Deutsch E, Tarazona N, Shaknovitch A, Newman G, Patterson C and Bush H L, Jr. (1999) The Expression of TGF-Beta Receptors in Human Atherosclerosis: Evidence for Acquired Resistance to Apoptosis Due to Receptor Imbalance. *J Mol Cell Cardiol* **31**:1627-1642.

Refaat BA, Bahathiq A O, Sockanathan S, Stewart R L, Wells M and Ledger W L (2004) Production and Localization of Activins and Activin Type IIA and IIB Receptors by the Human Endosalpinx. *Reproduction* **128**:249-255.

Vanttinen T, Kuulasmaa T, Liu J and Voutilainen R (2002) Expression of Activin/Inhibin Receptor and Binding Protein Genes and Regulation of Activin/Inhibin Peptide Secretion in Human Adrenocortical Cells. *J Clin Endocrinol Metab* **87**:4257-4263.
